# Supplementary material for: Green synthesis, characterization of Radix Hedysari-mediated silver nanoparticles and their use for sensitive colorimetric detection of Pb2+ in the Yellow River medium
Source: Royal Society of Chemistry journal article supplement (doi:10.1039/d1ay01852c), 2022-01-01
Supplement: d1ay01852c1.pdf [file d1ay01852c1.pdf]

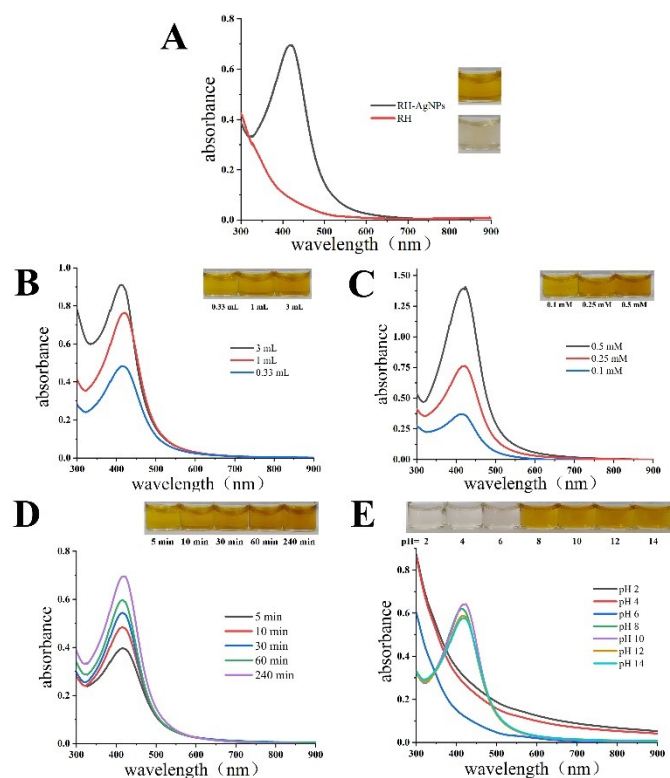

**Fig. S1** (A) Photographs UV-vis spectrum of RH and RH-AgNPs. Photographs and UV-vis spectra of RH-AgNPs using (B) different AgNO<sub>3</sub> concentrations and (C) different volume of RH. Photographs and UV-vis spectra of RH-AgNPs prepared under different (D) reaction time (E) pH values.

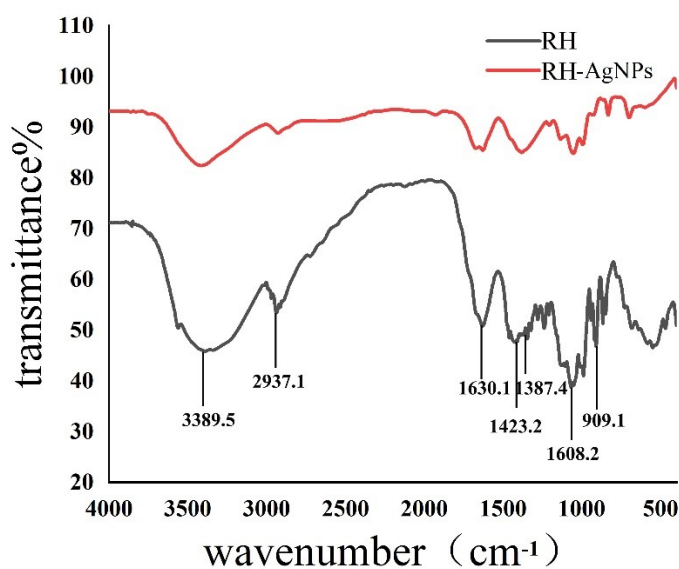

**Fig.S2** The FT-IR spectra of RH and RH-AgNPs.

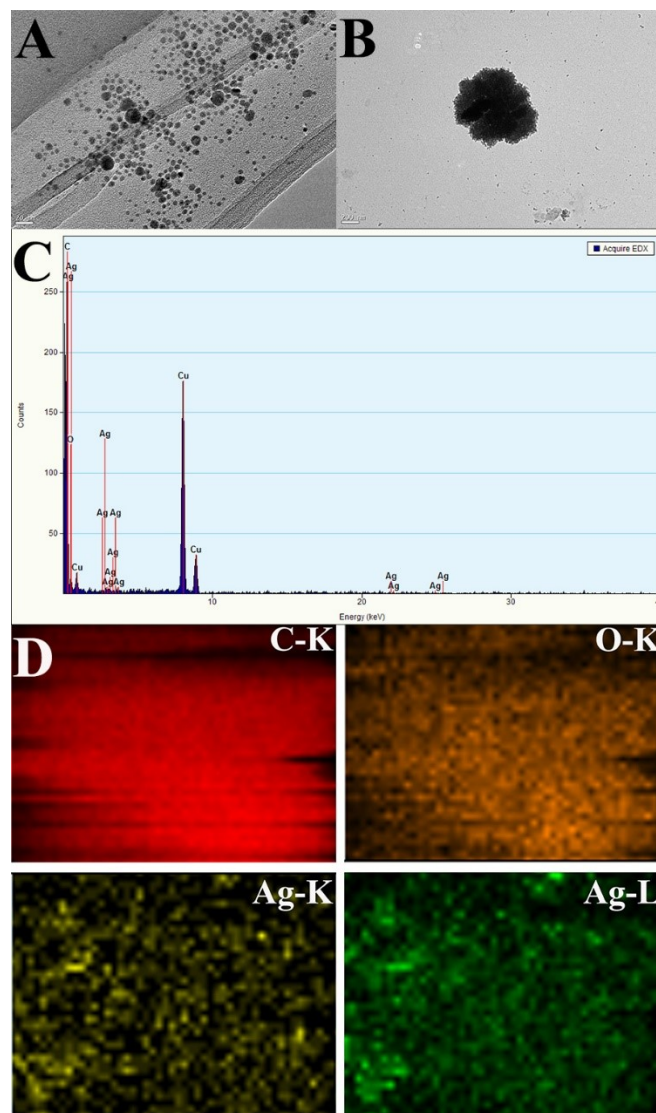

**Fig.S3** TEM image of RH-AgNPs (A) in the absence of  $Pb^{2+}$ , (B) in the presence of  $Pb^{2+}$ . (C) EDS images of RH-AgNPs.  
(D) Mapping image of RH-AgNPs.

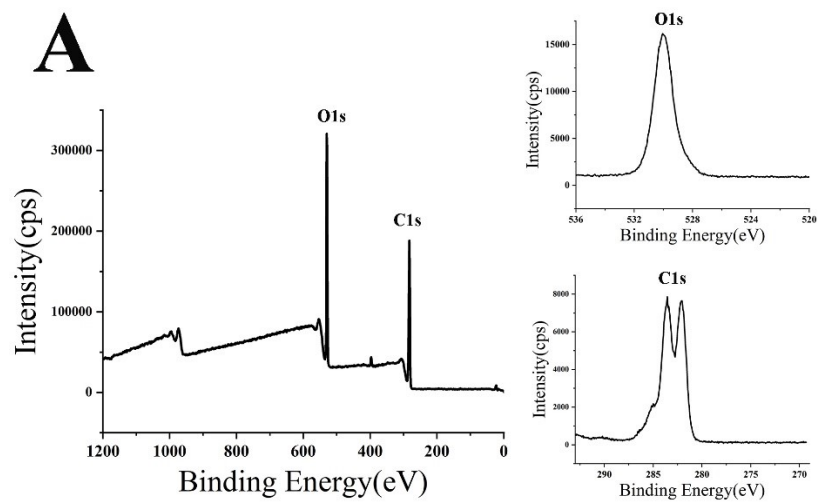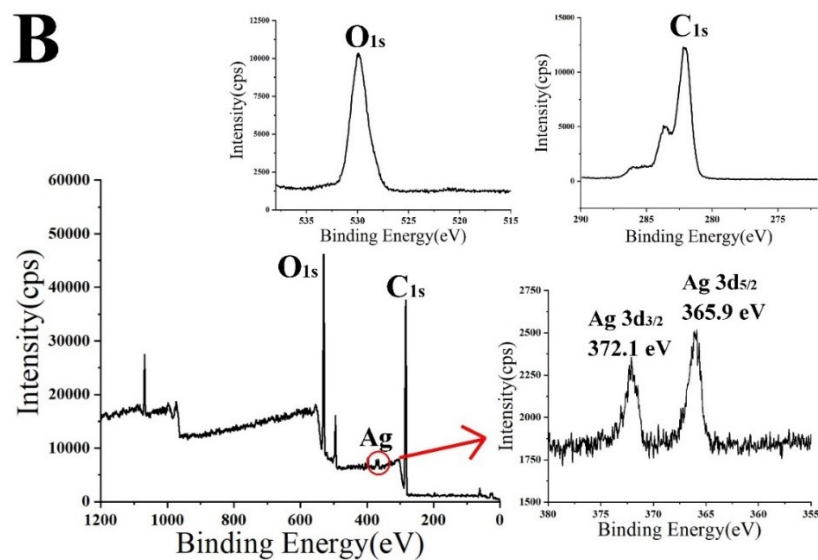

Fig.S4 The XPS analysis of (A) RH and (B) RH-AgNPs.

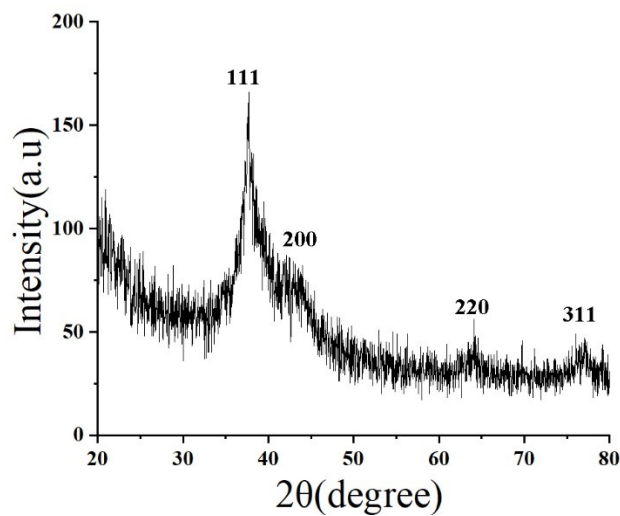

Fig.S5 X-ray diffraction patterns of RH-AgNPs.
